# Supplementary material for: Immunoinformatics-Based Designing of a Multi-Epitope Chimeric Vaccine From Multi-Domain Outer Surface Antigens of Leptospira
Source: PubMed Central journal article supplement (PMC8670241; doi:10.3389/fimmu.2021.735373), 2021-11-30

## Supplementary information

### **Immunoinformatics based designing of a multi-epitope chimeric vaccine from multi-domain outer surface antigens of *Leptospira***

**Pankaj Kumar<sup>#</sup>, Surabhi Lata<sup>#</sup>, Umate Nachiket Shankar, Mohd. Akif\***

Laboratory of Structural Biology, Department of Biochemistry, School of Life Sciences,  
University of Hyderabad, Hyderabad, (500046), INDIA

# Authors contributed equally

\*Correspondence: Mohd. Akif,

Email: [akif@uohyd.ac.in](mailto:akif@uohyd.ac.in)

**Table S1: Ramachandran statistics and ProSA Z score**

| <b>Protein</b> | <b>Favoured<br/>Region (%)</b> | <b>Allowed<br/>Region (%)</b> | <b>Outlier<br/>Region (%)</b> | <b>ProSA<br/>Z-Score</b> |
|----------------|--------------------------------|-------------------------------|-------------------------------|--------------------------|
| LigA7          | 94.3                           | 5.7                           | 0                             | -3.64                    |
| LigA8          | 92.7                           | 6.1                           | 1.2                           | -4.47                    |
| LigA9          | 93                             | 7                             | 0                             | -4.47                    |
| LigA10         | 95.3                           | 3.5                           | 1.2                           | -4.18                    |
| LigA11         | 94.1                           | 5.9                           | 0                             | -4.66                    |
| LigA12         | 92                             | 6.9                           | 1.1                           | -5.17                    |
| LigA13         | 92                             | 6.9                           | 1.1                           | -4.35                    |
| LigB1          | 95.3                           | 4.7                           | 0                             | -4.96                    |
| LigB2          | 96.4                           | 2.4                           | 1.2                           | -3.88                    |
| LigB3          | 96.3                           | 3.7                           | 0                             | -4.01                    |
| LigB4          | 96.5                           | 2.3                           | 1.2                           | -4.10                    |
| LigB5          | 97.6                           | 1.2                           | 1.2                           | -3.50                    |
| LigB6          | 97.7                           | 1.1                           | 1.1                           | -3.82                    |
| LigB7          | 94.3                           | 4.5                           | 1.1                           | -2.98                    |
| LigB8          | 94                             | 6                             | 0                             | -3.10                    |
| LigB9          | 94.3                           | 4.5                           | 1.1                           | -3.73                    |
| LigB10         | 94.3                           | 4.5                           | 1.1                           | -3.17                    |
| LigB11         | 95.3                           | 3.5                           | 1.2                           | -2.77                    |
| LigB12         | 95.5                           | 3.4                           | 1.1                           | -4.70                    |

**Table S2: List of predicted conformation BCL epitopes**

| Domain | BEPro                            | DiscoTope 2.0                        |       | ElliPro                                                                                                                                                 |       |       |
|--------|----------------------------------|--------------------------------------|-------|---------------------------------------------------------------------------------------------------------------------------------------------------------|-------|-------|
|        | Residue No.                      | Residue No                           | Total | Residue                                                                                                                                                 | Total | Score |
| LigA7  | 1-2, <u>30-33,36</u> , 54, 56-59 | 2, 5, <u>29-36</u> , 56, 58, 59      | 13    | A:A1, A:K2, A:L3, A:V4, A:E5, <u>A:F29, A:T30, A:D31, A:N32, A:S33, A:N34</u> , A:G78, A:G79                                                            | 13    | 0.791 |
|        |                                  |                                      |       | A:N55, A:T56, A:N57, A:A58, A:K59                                                                                                                       | 5     | 0.771 |
|        |                                  |                                      |       | A:A11, A:A12, A:A13, A:S14, A:K15, A:A16, A:K17, A:G18, A:S46, A:N47, A:T48, A:D49, A:I50, A:L66, A:K67, A:Q68, A:G69, A:T70, A:T87, A:T89, A:Q90       | 21    | 0.67  |
| LigA8  | 1, 12, <u>24-32</u> , 51-54, 74  | 1, 22, <u>24-32</u> , 36, 52-54,     | 15    | A:S1, <u>A:I24, A:F25, A:T26, A:D27, A:H28, A:S29, A:K30</u>                                                                                            | 8     | 0.833 |
| LigA8  | 1, 12, <u>24-32</u> , 51-54, 74  | 1, 22, <u>24-32</u> , 36, 52-54,     | 15    | A:I33, A:A51, A:P52, A:G53, A:E54, A:E55                                                                                                                | 6     | 0.72  |
|        |                                  |                                      |       | A:T34, A:E35, A:Q36, A:E73, A:K74                                                                                                                       | 5     | 0.652 |
|        |                                  |                                      |       | A:T7, A:A9, A:S10, A:A12, A:K13, A:G14, A:M15, A:S42, A:S43, A:K44, A:A45, A:L46, A:I61, A:A62, A:V63, A:G64, A:N65, A:T82, A:T84                       | 19    | 0.647 |
| LigA9  | 1, <u>26-31</u> , 51, 53-56      | 2, 4, <u>23, 25, 27-33</u> , 54, 55, | 13    | A:T1, A:S2, A:I25, <u>A:Y26, A:S27, A:D28, A:N29, A:S30, A:S31</u> , A:K32, A:I34, A:T35, A:S36, A:S51, A:N52, A:T53, A:K54, A:G55, A:Y56, A:G75, A:N76 | 21    | 0.725 |
| LigA9  | 1, <u>26-31</u> , 51, 53-56      | 2, 4, <u>23, 25, 27-33</u> , 54, 55, | 13    | A:H10, A:C11, A:L12, A:V13, A:K14, A:G15, A:S43, A:N44, A:N45, A:S46, A:V47, A:G64, A:T65, A:G66, A:T67, A:S85, A:T87, A:A88                            | 18    | 0.705 |
|        |                                  |                                      |       | A:V8, A:K9, A:K83                                                                                                                                       | 3     | 0.561 |
| LigA10 | 13, <u>27-30</u> , 54-56         | 13, <u>28, 29</u> , 87               | 4     | A:A53, A:T54, A:G55, A:S56, A:K57                                                                                                                       | 5     | 0.823 |
| LigA10 | 13, <u>27-30</u> , 54-56         | 13, <u>28, 29</u> , 87               | 4     | A:I1, A:E2, A:V25, <u>A:F26, A:T27, A:D28, A:N29, A:S30</u> , A:T31, A:K32, A:D33, A:I34, A:T35                                                         | 13    | 0.804 |

Supplementary Material

|        |                                                                   |                                                     |    |                                                                                                                                                                                     |    |       |
|--------|-------------------------------------------------------------------|-----------------------------------------------------|----|-------------------------------------------------------------------------------------------------------------------------------------------------------------------------------------|----|-------|
|        |                                                                   |                                                     |    | A:T8, A:S9, A:S10, A:H11, A:K12, A:A13, A:K14, A:G15, A:S43, A:N44, A:T45, A:A46, A:Y47, A:L63, A:S64, A:K65, A:G66, A:T67, A:Q85, A:T87                                            | 20 | 0.699 |
| LigA11 | <u>13-15</u> , 27-30, <u>47</u> , 55, 65,                         | <u>13-15</u> , 28, 29, <u>47</u> , 65, 67, 87       | 9  | A:V1, A:S2, A:I25, A:Y26, A:T27, A:D28, A:H29, A:S30, A:E31                                                                                                                         | 9  | 0.815 |
| LigA11 | <u>13-15</u> , 27-30, <u>47</u> , 55, 65,                         | <u>13-15</u> , 28, 29, <u>47</u> , 65, 67, 87       | 9  | <u>A:A13, A:K14, A:G15</u> , A:T87                                                                                                                                                  | 4  | 0.784 |
|        |                                                                   |                                                     |    | A:I34, A:E51, A:T53, A:F54, A:G55, A:S56, A:A57                                                                                                                                     | 7  | 0.686 |
|        |                                                                   |                                                     |    | A:N8, A:N9, A:I10, A:S11, <u>A:S43, A:N44, A:P45, A:K46, A:I47</u> , A:N64, A:I65, A:G66, A:S67, A:N85                                                                              | 14 | 0.677 |
|        |                                                                   |                                                     |    | A:T35, A:E36, A:Q37, A:V38, A:S75, A:D76, A:T77                                                                                                                                     | 7  | 0.575 |
| LigA12 | 1-2, 4, 6, 13, <u>25-33</u> , 53-55, <u>76-78</u> , 89            | 1, 2, 4, <u>23-33</u> , 35-37, 55, 73, <u>75-79</u> | 24 | A:R1, A:Y2, <u>A:T25, A:Y26, A:S27, A:D28, A:Q29, A:S30, A:T31, A:K32</u> , A:L34, A:T35, A:E36, A:N52, A:T53, A:P54, A:G55, A:K56, A:K57, A:Y74, <u>A:D75, A:H76, A:H77, A:Q79</u> | 24 | 0.682 |
|        | 1-2, 4, 6, 13, <u>25-33</u> , 53-55, <u>76-78</u> , 89            | 1, 2, 4, <u>23-33</u> , 35-37, 55, 73, <u>75-79</u> | 24 | A:S8, A:Y9, A:A10, A:G11, A:E13, A:K14, A:G15, A:Y16, A:S43, A:N44, A:P45, A:S46, A:S47, A:S63, A:E64, A:L65, A:G66, A:E67, A:T86, A:T88, A:E89                                     | 21 | 0.660 |
| LigA13 | 1, 15, <u>29-32</u> , 56-57, 89                                   | 1, <u>29-31</u> ,                                   | 4  | A:S53, A:N54, A:V55, A:D56, A:D57, A:E58                                                                                                                                            | 6  | 0.732 |
|        | 1, 15, <u>29-32</u> , 56-57, 89                                   | 1, <u>29-31</u> ,                                   | 4  | A:G1, A:I2, A:V3, A:N4, <u>A:K27, A:F28, A:E29, A:N30, A:G31, A:A32, A:E33, A:I34, A:L36, A:T37, A:E38</u> , A:N77, A:S78                                                           | 17 | 0.697 |
|        |                                                                   |                                                     |    | A:S10, A:S11, A:I12, A:S13, A:K14, A:T15, A:K16, A:G17, A:S45, A:N46, A:P47, A:T48, A:V49, A:L65, A:S66, A:V67, A:G68, A:S69, A:K71, A:D84, A:E86, A:T88, A:P89                     | 23 | 0.646 |
| LigB1  | <u>1-6</u> , 18-19, <u>29-37</u> , 40, 49-50, 55-56, 74-76, 86-87 | <u>1-6</u> , 27, <u>29-37</u> , 40, 41, 56, 74-77   | 23 | <u>A:N1, A:P2, A:T3, A:T5, A:R6, A:I29, A:F30, A:D31, A:N32, A:G33, A:T34, A:N35, A:Q36</u>                                                                                         | 13 | 0.8   |
| LigB1  | <u>1-6</u> , 18-19, <u>29-37</u> , 40, 49-50, 55-56, 74-76, 86-87 | <u>1-6</u> , 27, <u>29-37</u> , 40, 41, 56, 74-77   | 23 | A:S14, A:S15, A:I16, A:A17, A:N18, A:G19, A:S48, A:Q49, A:S50, A:V51, A:I62, A:A63, A:S64, A:G65, A:S66, A:T83, A:V84, A:T85, A:P86, A:A87                                          | 20 | 0.647 |

Supplementary Material

|       |                                                                                           |                                                                                  |    |                                                                                                                                                                              |    |       |
|-------|-------------------------------------------------------------------------------------------|----------------------------------------------------------------------------------|----|------------------------------------------------------------------------------------------------------------------------------------------------------------------------------|----|-------|
| LigB2 | <u>1</u> , 14-15, <u>25-32</u> , 38, 48, 73-75, 85-86                                     | <u>1</u> , 14,15, <u>25-32</u> , 38, 48, 73, 74                                  | 15 | <u>A:S1</u> , A:Q3, <u>A:I25</u> , <u>A:F26</u> , <u>A:S27</u> , <u>A:D28</u> , <u>A:G29</u> ,<br><u>A:S30</u> , <u>A:H31</u>                                                | 9  | 0.832 |
| LigB2 | <u>1</u> , 14-15, <u>25-32</u> , 38, 48, 73-75, 85-86                                     | <u>1</u> , 14,15, <u>25-32</u> , 38, 48, 73, 74                                  | 15 | A:S9, A:G10, A:I11, A:L12, A:P13, A:K14, A:G15, A:T16, A:N17, A:S45, A:N46, A:P47, A:D48, A:L49, A:I61, A:N62, A:L63, A:G64, A:T65, A:E80, A:T82, A:V83, A:G84, A:D85, A:A86 | 25 | 0.623 |
|       |                                                                                           |                                                                                  |    | A:I34, A:S35, A:N36, A:D37, A:P38, A:L39, A:D53, A:D54, A:S55, A:G56, A:Q73, A:S74, A:K75                                                                                    | 13 | 0.573 |
| LigB3 | 1-2, 6-7, 9, 14-15, 17, 19, 23, <u>25-33</u> , 36, 45-46, <u>51-53</u> , 55, 71-72, 83-84 | 1, 2, 7, 9, 14, 15, 17, <u>23-33</u> , 36, 46, <u>51-53</u> , 59, 71, 72, 83, 84 | 28 | A:S1, A:Q2, <u>A:I25</u> , <u>A:Y26</u> , <u>A:S27</u> , <u>A:D28</u> , <u>A:N29</u> ,<br><u>A:S30</u> , <u>A:N31</u> , <u>A:R32</u> , A:I34                                 | 11 | 0.767 |
| LigB3 | 1-2, 6-7, 9, 14-15, 17, 19, 23, <u>25-33</u> , 36, 45-46, <u>51-53</u> , 55, 71-72, 83-84 | 1, 2, 7, 9, 14, 15, 17, <u>23-33</u> , 36, 46, <u>51-53</u> , 59, 71, 72, 83, 84 | 28 | A:E71, A:N72, A:I73, A:I74                                                                                                                                                   | 4  | 0.726 |
|       |                                                                                           |                                                                                  |    | A:N8, A:N9, A:P10, A:N11, A:I12, A:P13, A:L14, A:G15, A:K16, A:K17, A:S43, A:N44, A:S45, A:T46, A:I47, A:A59, A:D60, A:T61, A:G62, A:I63, A:I80, A:T82, A:P83, A:A84         | 24 | 0.634 |
|       |                                                                                           |                                                                                  |    | A:S35, A:S36, A:S37, <u>A:Q51</u> , <u>A:N52</u> , <u>A:N53</u>                                                                                                              | 6  | 0.552 |
| LigB4 | 1, <u>26-31</u> , 46, <u>53-55</u> , 66, 75-76, 88                                        | <u>25</u> , <u>27-31</u> , <u>54</u> , <u>55</u> , 76                            | 9  | A:V1, A:S2, <u>A:I25</u> , <u>A:F26</u> , <u>A:T27</u> , <u>A:D28</u> , <u>A:N29</u> ,<br><u>A:S30</u> , <u>A:N31</u> , <u>A:S32</u> , <u>A:I34</u>                          | 11 | 0.758 |
| LigB4 | 1, <u>26-31</u> , 46, <u>53-55</u> , 66, 75-76, 88                                        | <u>25</u> , <u>27-31</u> , <u>54</u> , <u>55</u> , 76                            | 9  | A:G75, A:G76, A:I77, A:Q78                                                                                                                                                   | 4  | 0.716 |
|       |                                                                                           |                                                                                  |    | A:S51, A:N52, <u>A:A53</u> , <u>A:S54</u> , A:D55, A:S56, A:H57                                                                                                              | 7  | 0.695 |
|       |                                                                                           |                                                                                  |    | A:T8, A:N9, A:S10, A:T11, A:V12, A:A13, A:K14, A:G15, A:L16, A:S43, A:N44, A:T45, A:D46, A:I47, A:L63, A:N64, A:Q65, A:G66, A:N67, A:T84, A:V85, A:T86, A:Q87, A:A88         | 24 | 0.649 |
| LigB5 | 1, <u>25-32</u> , 36, <u>52-55</u> , 74-75                                                | <u>25-32</u> , <u>52-54</u> ,                                                    | 11 | A:T1, A:S2, <u>A:I25</u> , <u>A:F26</u> , <u>A:T27</u> , <u>A:D28</u> , <u>A:N29</u> ,<br><u>A:S30</u> , <u>A:K31</u>                                                        | 9  | 0.854 |
| LigB5 | 1, <u>25-32</u> , 36, <u>52-55</u> , 74-75                                                | <u>25-32</u> , <u>52-54</u> ,                                                    | 11 | A:G74, A:K75, A:V76, A:S77                                                                                                                                                   | 4  | 0.713 |
|       |                                                                                           |                                                                                  |    | A:V8, A:L9, A:P10, A:S11, A:I12, A:A13, A:K14, A:G15, A:L16, A:S43, A:S44, A:A45, A:I46, A:V47, A:H62,                                                                       | 24 | 0.610 |

Supplementary Material

|       |                                                       |                                            |    |                                                                                                                                                                            |    |       |
|-------|-------------------------------------------------------|--------------------------------------------|----|----------------------------------------------------------------------------------------------------------------------------------------------------------------------------|----|-------|
|       |                                                       |                                            |    | A:A63, A:V64, A:G65, A:D66, A:T83, A:V84, A:V85, A:P86, A:A8                                                                                                               |    |       |
|       |                                                       |                                            |    | A:T35, A:D36, A:Q37, A:S48, A:V49, A:S50, A:N51, <b>A:L52, A:D53, A:D54</b> , A:N55, A:K56                                                                                 | 12 | 0.573 |
| LigB6 | 1-2, 7, <b>25-33</b> , 36, <b>53-56</b> , 76, 90      | 1, 2, <b>23-33</b> , 36, <b>53-55</b> , 76 | 18 | A:T1, A:S2, <b>A:I25, A:Y26, A:S27, A:D28, A:N29, A:S30, A:N31, A:K32</b>                                                                                                  | 10 | 0.831 |
| LigB6 | 1-2, 7, <b>25-33</b> , 36, <b>53-56</b> , 76, 90      | 1, 2, <b>23-33</b> , 36, <b>53-55</b> , 76 | 18 | A:G75, A:K76, A:V77, A:S78                                                                                                                                                 | 4  | 0.711 |
|       |                                                       |                                            |    | A:S36, <b>A:S51, A:N52, A:A53, A:Q54, A:K55</b> , A:N56, A:Q57                                                                                                             | 8  | 0.697 |
|       |                                                       |                                            |    | A:S11, A:L12, A:A13, A:K14, A:G15, A:S43, A:D44, A:S45, A:S46, A:I47, A:A63, A:A64, A:T65, A:G66, A:A67, A:V86, A:T87, A:A88, A:A89, A:K90                                 | 20 | 0.670 |
| LigB7 | 1, <b>25-32</b> , 36, 45-46, <b>53-56</b> , 76, 89-90 | <b>26-31</b> , 46, <b>53-55</b> , 90       | 11 | A:V1, A:E2, <b>A:I25, A:F26, A:T27, A:D28, A:N29, A:S30, A:N31, A:S32, A:I34</b>                                                                                           | 11 | 0.768 |
| LigB7 | 1, <b>25-32</b> , 36, 45-46, <b>53-56</b> , 76, 89-90 | <b>26-31</b> , 46, <b>53-55</b> , 90       | 11 | A:A10, A:S11, A:K12, A:A13, A:K14, A:G15, A:L16, A:S43, A:N44, A:T45, A:D46, A:I47, A:E49, A:L63, A:T64, A:P65, A:G66, A:S67, A:K85, A:V86, A:T87, A:P88, A:A89, A:Q90     | 24 | 0.653 |
|       |                                                       |                                            |    | A:T35, A:N36, A:Q37, <b>A:T51, A:N52, A:T53, A:S54, A:G55, A:S56, A:K57</b>                                                                                                | 10 | 0.607 |
|       |                                                       |                                            |    | A:L74, A:G75, A:S76, A:I77, A:K78, A:S79, A:S80                                                                                                                            | 7  | 0.579 |
| LigB8 | <b>27-30</b> , 45-46, 52, 73, 85                      | <b>28, 29</b> , 46                         | 3  | A:D72, A:S73, A:I74                                                                                                                                                        | 3  | 0.776 |
| LigB8 | <b>27-30</b> , 45-46, 52, 73, 85                      | <b>28, 29</b> , 46                         | 3  | A:I1, A:S2, <b>A:T25, A:Y26, A:T27, A:D28, A:H29, A:S30, A:V31, A:Q32, A:V34, A:T35, A:A36, A:L37, A:A38</b> , A:N51, A:N52, A:V53, A:T54, A:G55                           | 20 | 0.640 |
|       |                                                       |                                            |    | A:P7, A:I8, A:N9, A:P10, A:S11, A:V12, A:A13, A:K14, A:G15, A:L16, A:S43, A:N44, A:P45, A:R46, A:K47, A:V60, A:A61, A:T62, A:G63, A:N64, A:N81, A:V82, A:T83, A:P84, A:A85 | 25 | 0.625 |

Supplementary Material

|        |                                                                                         |                                                                                           |    |                                                                                                                                                                                      |    |       |
|--------|-----------------------------------------------------------------------------------------|-------------------------------------------------------------------------------------------|----|--------------------------------------------------------------------------------------------------------------------------------------------------------------------------------------|----|-------|
| LigB9  | 1-2, 7, 9, 14-15, <u>26-31</u> , 45-46, <u>51, 53-56</u> , 66, 75, 76, 81, <u>89-90</u> | 2, 7, 9, 13-15, <u>26-31</u> , 33, 44-46, <u>51, 53-56</u> , 63, 64, 66, 67, <u>88-90</u> | 28 | A:T1, A:S2, <u>A:I25, A:F26, A:S27, A:D28, A:K29, A:S30, A:T31, A:Q32</u>                                                                                                            | 10 | 0.832 |
| LigB9  | 1-2, 7, 9, 14-15, <u>26-31</u> , 45-46, <u>51, 53-56</u> , 66, 75, 76, 81, <u>89-90</u> | 2, 7, 9, 13-15, <u>26-31</u> , 33, 44-46, <u>51, 53-56</u> , 63, 64, 66, 67, <u>88-90</u> | 28 | A:F76, A:I77, A:Q78                                                                                                                                                                  | 3  | 0.719 |
|        |                                                                                         |                                                                                           |    | A:T35, A:Q36, A:L37, A:E51, A:N52, <u>A:T53, A:S54, A:G55, A:K56, A:K57</u>                                                                                                          | 10 | 0.627 |
|        |                                                                                         |                                                                                           |    | A:T8, A:I9, A:N10, A:S11, A:I12, A:T13, A:H14, A:G15, A:L16, A:S43, A:D44, A:P45, A:S46, A:K47, A:S63, A:K64, A:L65, A:G66, A:S67, A:V86, A:T87, <u>A:D88, A:L89</u>                 | 23 | 0.611 |
| LigB10 | 1-2, 7, <u>25-31, 53-55</u> , 75-77, 90                                                 | 1, 2, <u>25-31, 54, 55</u> , 76                                                           | 12 | A:K1, A:S2, <u>A:T25, A:F26, A:I27, A:D28, A:G29, A:S30, A:E31, A:Q32</u>                                                                                                            | 10 | 0.844 |
| LigB10 | 1-2, 7, <u>25-31, 53-55</u> , 75-77, 90                                                 | 1, 2, <u>25-31, 54, 55</u> , 76                                                           | 12 | A:N75, A:S76, A:I77                                                                                                                                                                  | 3  | 0.770 |
|        |                                                                                         |                                                                                           |    | A:S10, A:S11, A:I12, A:A13, A:K14, A:G15, A:L16, A:S43, A:K44, A:S45, A:D46, A:V47, A:A48, A:A62, A:L63, A:S64, A:I65, A:G66, A:S67, A:N83, A:N85, A:V86, A:S87, A:A88, A:A89, A:T90 | 26 | 0.607 |
|        |                                                                                         |                                                                                           |    | A:T35, A:N36, A:L37, A:I50, A:N51, A:N52, <u>A:A53, A:A54, A:N55</u> , A:E56, A:K57                                                                                                  | 11 | 0.600 |
| LigB11 | <u>1-2, 4</u> , 7, 9, 15, <u>25-32</u> , 45-46, 53-56, 75-77, 80, 87, 88                | <u>1-4</u> , 6, 7, 9, <u>23-33</u> , 36, 37, 46, 53-56, 67, 73, 75-78, 80, 82             | 33 | <u>A:D1, A:S2, A:K4, A:V25, A:Y26, A:S27, A:D28, A:S29, A:T30, A:I31, A:Q32</u>                                                                                                      | 11 | 0.806 |
| LigB11 | <u>1-2, 4</u> , 7, 9, 15, <u>25-32</u> , 45-46, 53-56, 75-77, 80, 87, 88                | <u>1-4</u> , 6, 7, 9, <u>23-33</u> , 36, 37, 46, 53-56, 67, 73, 75-78, 80, 82             | 33 | A:N75, A:S76, A:I77                                                                                                                                                                  | 3  | 0.754 |
|        |                                                                                         |                                                                                           |    | A:V8, A:N9, A:N10, A:N11, A:I12, A:A13, A:K14, A:G15, A:L16, A:S43, A:N44, A:S45, A:S46, A:S47, A:L63, A:Q64, A:I65, A:G66, A:N67, A:T84, A:V85, A:S86, A:A87, A:A88                 | 24 | 0.642 |
|        |                                                                                         |                                                                                           |    | A:S35, A:D36, A:S37, A:S51, A:N52, A:S53, A:T54, A:E55, A:T56, A:K57, A:G58                                                                                                          | 11 | 0.544 |

Supplementary Material

|        |                                                                               |                                                                |    |                                                                                                                                                                                                                                                                                                  |    |       |
|--------|-------------------------------------------------------------------------------|----------------------------------------------------------------|----|--------------------------------------------------------------------------------------------------------------------------------------------------------------------------------------------------------------------------------------------------------------------------------------------------|----|-------|
| LigB12 | <b><u>14-15</u></b> , 27-30, 45-47, 53-55, 64, 66-67, 76, <b><u>86-90</u></b> | <b><u>14, 15</u></b> , 46, 63, 64, 66, 67, <b><u>86-90</u></b> | 12 | A:S1, A:S2, A:G24, A:T25, A:Y26, A:S27, A:A28, A:G29, A:T30, A:K31, A:A32, A:L34                                                                                                                                                                                                                 | 12 | 0.749 |
| LigB12 | <b><u>14-15</u></b> , 27-30, 45-47, 53-55, 64, 66-67, 76, <b><u>86-90</u></b> | <b><u>14, 15</u></b> , 46, 63, 64, 66, 67, <b><u>86-90</u></b> | 12 | A:G75, A:S76, A:V77, A:S78                                                                                                                                                                                                                                                                       | 4  | 0.708 |
|        |                                                                               |                                                                |    | A:P7, A:I8, A:N9, A:T10, A:N11, A:I12, A:N13, <b><u>A:T14</u></b> , <b><u>A:T15</u></b> , A:S43, A:N44, A:Q45, A:S46, A:Q47, A:K49, A:I63, A:A64, A:S65, A:G66, A:N67, A:T84, A:V85, <b><u>A:N86</u></b> , <b><u>A:K87</u></b> , <b><u>A:T88</u></b> , <b><u>A:D89</u></b> , <b><u>A:T90</u></b> | 27 | 0.622 |
|        |                                                                               |                                                                |    | A:T35, A:S36, A:S37, A:S51, A:N52, A:A53, A:S54, A:E55, A:T56, A:K57                                                                                                                                                                                                                             | 10 | 0.614 |
|        |                                                                               |                                                                |    |                                                                                                                                                                                                                                                                                                  |    |       |



**Table S3: List of predicted linear BCL epitopes**

| Domain | BepiPred 2.0                |                     | BCPred                     |                     |                     | ABCPred,                     |                     |                    |
|--------|-----------------------------|---------------------|----------------------------|---------------------|---------------------|------------------------------|---------------------|--------------------|
|        | Peptide                     | Position            | Peptide                    | Position            | Score               | Peptides                     | Position            | Score              |
| LigA7  | ASKAKGLT                    | 12-19               | <b><u>FTDNSNSDITNQ</u></b> | <b><u>28-39</u></b> | <b><u>0.992</u></b> | IQITPAAASKAKGL               | 5-18                | 0.87               |
|        | <b><u>FTDNSNSDI</u></b>     | <b><u>28-36</u></b> | TWNSSNTDILTV               | 41-52               | 0.916               | AKGLTERFKATGIF               | 15-28               | 0.87               |
|        | VSNTNAKRGLG                 | 52-62               | GLGSTLKQGTVK               | 60-71               | 0.695               | QGTVKVTASMGIE                | 67-80               | 0.80               |
|        | EDS                         | 79-81               | DSVDFTVTQATL               | 81-92               | 0.583               | LGSTLKQGTVKVTA               | 61-74               | 0.80               |
|        |                             |                     |                            |                     |                     | SNSDITNQVTWNSS               | 32-45               | 0.80               |
|        |                             |                     |                            |                     |                     | <b><u>FKATGIFTDNSNSD</u></b> | <b><u>22-35</u></b> | <b><u>0.78</u></b> |
|        |                             |                     |                            |                     |                     | AAASKAKGLTERFK               | 10-23               | 0.75               |
| LigA8  | <b><u>VSPTRASIAGK</u></b>   | <b><u>5-15</u></b>  | <b><u>TSIEVSPTRASI</u></b> | <b><u>1-12</u></b>  | <b><u>0.898</u></b> | NISITATLEKLSGK               | 66-79               | 0.86               |
|        | TDHSSKNIT                   | 27-35               | KKNITEQVTWKS               | 31-42               | 0.741               | SSSKALSMLNAPGE               | 42-55               | 0.81               |
|        | KSSSKALS                    | 41-48               | LSGKTDITVTPA               | 76-87               | 0.715               | <b><u>VSPTRASIAGMTO</u></b>  | <b><u>5-18</u></b>  | <b><u>0.80</u></b> |
|        | APGEEGTGKAI                 | 52-62               | APGEEGTGKAIA               | 52-63               | 0.675               | SMLNAPGEEGTGKA               | 48-61               | 0.79               |
|        |                             |                     | KGMTQKFTATGI               | 14-25               | 0.307               | HSKKNITEQVTWKS               | 29-42               | 0.79               |
|        |                             |                     |                            |                     |                     | GTGKAIAVGNISIT               | 57-70               | 0.75               |
|        |                             |                     |                            |                     |                     | GIFTDHSKKNITEQ               | 24-37               | 0.75               |
| LigA9  | ISPVKHCLVKGLT               | 5-17                | TLGNVSSQVSKL               | 73-84               | 0.999               | NTKGYQGQAHGTGT               | 52-65               | 0.94               |
|        | <b><u>YSDNSSKDI</u></b>     | <b><u>26-34</u></b> | AHGTGTGTVDIK               | 60-71               | 0.946               | <b><u>GIYSDNSSKDITSA</u></b> | <b><u>24-37</u></b> | <b><u>0.78</u></b> |
|        | SSNN                        | 42-45               | VATISNTKGYQG               | 47-58               | 0.616               | SKDITSAVTWHSSN               | 31-44               | 0.75               |
|        | NTKGYQGQ                    | 52-59               | <b><u>TGIYSDNSSKDI</u></b> | <b><u>23-34</u></b> | <b><u>0.373</u></b> |                              |                     |                    |
| LigA10 | <b><u>NPTSSHKAKGLTE</u></b> | <b><u>6-18</u></b>  | <b><u>FTDNSTKDITDO</u></b> | <b><u>26-37</u></b> | <b><u>0.948</u></b> | <b><u>TDNSTKDITDQVTW</u></b> | <b><u>27-40</u></b> | <b><u>0.88</u></b> |
|        | <b><u>TDNSTKDITD</u></b>    | <b><u>27-36</u></b> | ISNATGSKGVVN               | 50-61               | 0.720               | <b><u>LNPTSSHKAKGLTE</u></b> | <b><u>5-18</u></b>  | <b><u>0.85</u></b> |
|        | SS                          | 42-43               | SSANATFQVTPA               | 78-89               | 0.411               | ITDQVTWKSSNTAY               | 34-47               | 0.84               |
|        | NATGSK                      | 52-57               | <b><u>HKAKGLTENFKA</u></b> | <b><u>11-22</u></b> | <b><u>0.338</u></b> | SHKAKGLTENFKAT               | 10-23               | 0.80               |
|        |                             |                     |                            |                     |                     | LTENFKATGVFTDN               | 16-29               | 0.77               |
|        |                             |                     |                            |                     | KGTS HISATLGSIS     | 65-78                        | 0.75                |                    |

Supplementary Material

|        |                                                             |                     |                            |                     |                     |                              |                     |                    |
|--------|-------------------------------------------------------------|---------------------|----------------------------|---------------------|---------------------|------------------------------|---------------------|--------------------|
| LigA11 | <b><u>IPNNISFAKGS</u></b>                                   | <b><u>6-17</u></b>  | VSTTNIGSTNIT               | 60-71               | 0.855               | EADITEQVTWSSSN               | 31-44               | 0.85               |
|        | YTDHSEADI                                                   | 26-34               | <b><u>AKGNSYQFKATG</u></b> | <b><u>13-24</u></b> | <b><u>0.639</u></b> | FKATGIYTDHSEAD               | 20-33               | 0.85               |
|        | S                                                           | 43                  |                            |                     |                     | GSTNITAKLSDTV                | 66-79               | 0.83               |
|        | P                                                           | 45                  |                            |                     |                     | <b><u>VIPNNISFAKGNSY</u></b> | <b><u>5-18</u></b>  | <b><u>0.81</u></b> |
|        | A                                                           | 48                  |                            |                     |                     | ASVENTFGSAGLVS               | 48-61               | 0.75               |
|        | VENTFGSA                                                    | 50-57               |                            |                     |                     |                              |                     |                    |
| LigA12 | YAGIEKGYT                                                   | 9-17                | <b><u>GTYSDESTKDLT</u></b> | <b><u>24-35</u></b> | <b><u>0.920</u></b> | <b><u>SDOSTKDLTEDVTW</u></b> | <b><u>27-40</u></b> | <b><u>0.91</u></b> |
|        | <b><u>YSDOSTKDLTE</u></b>                                   | <b><u>28-36</u></b> | GEPDITVFYDHH               | 66-77               | 0.589               | TKQFSAIGTYSDQS               | 17-30               | 0.82               |
|        | S                                                           | 43                  | QSSYTPVTVTES               | 79-90               | 0.447               | SNPSSVVIENTPGK               | 43-56               | 0.75               |
|        | TPGKKG                                                      | 53-58               |                            |                     |                     | GIEKGYTKQFSAIG               | 11-24               | 0.75               |
| LigA13 | <b><u>SSISKTGSGT</u></b>                                    | <b><u>10-19</u></b> | <b><u>ISKTKGSTHOFK</u></b> | <b><u>12-23</u></b> | <b><u>0.842</u></b> | SNPTVVVISNVDDE               | 45-58               | 0.93               |
|        | ENGAEIDL                                                    | 29-37               | TGKFENGAEIDL               | 25-36               | 0.585               | <b><u>SSISKTGSGTHOFK</u></b> | <b><u>10-24</u></b> | <b><u>0.92</u></b> |
|        | S                                                           | 45                  | VVSISNVDDER                | 49-60               | 0.585               | AEIDLTELVTWSSS               | 32-45               | 0.81               |
|        | VDDERGL                                                     | 55-61               | SSSIDFEVTPEI               | 80-91               | 0.368               | STHOFKATGKFENG               | 18-31               | 0.79               |
| LigB1  | <b><u>ELSYQDSSIANGTST</u></b>                               | <b><u>7-21</u></b>  | DSTSIVPDSQSV               | 39-50               | 0.997               | LEVTAIFDNGTNQN               | 23-36               | 0.89               |
|        | FDNGTNQNITDSTSIV<br>PDSQS                                   | 29-49               | <b><u>SIANGTSTTLEV</u></b> | <b><u>14-25</u></b> | <b><u>0.996</u></b> | ITDSTSIVPDSQSV               | 37-50               | 0.88               |
|        | <b><u>RVRGIASGSSIIKAEY</u></b><br><b><u>NGLYSEQKITV</u></b> | <b><u>57-83</u></b> | YSEQKITVTPAT               | 76-87               | 0.613               | <b><u>ELSYQDSSIANGTS</u></b> | <b><u>7-20</u></b>  | <b><u>0.85</u></b> |
|        |                                                             |                     | <b><u>TIQGNRVRGIAS</u></b> | <b><u>52-63</u></b> | <b><u>0.053</u></b> | SIKAEYNGLYSEQ                | 66-79               | 0.80               |
|        |                                                             |                     |                            |                     |                     | IANGTSTTLEVTAI               | 15-28               | 0.78               |
|        |                                                             |                     |                            |                     |                     | NPTIRIELSYQDSS               | 1-14                | 0.78               |
|        |                                                             |                     |                            |                     |                     | <b><u>IQGNRVRGIASGSS</u></b> | <b><u>53-66</u></b> | <b><u>0.76</u></b> |
| LigB2  | <b><u>TSLGSGILPKG</u></b>                                   | <b><u>5-17</u></b>  | SSNPDLVQVDDS               | 45-56               | 0.739               | <b><u>IQVTSLGSILPKG</u></b>  | <b><u>3-16</u></b>  | <b><u>0.88</u></b> |
|        | <b><u>FSDGSHQDISNDPLIV</u></b><br><b><u>WSSNP</u></b>       | <b><u>27-48</u></b> | <b><u>SDGSHQDISNDP</u></b> | <b><u>28-39</u></b> | <b><u>0.635</u></b> | <b><u>SHQDISNDPLIVWS</u></b> | <b><u>31-44</u></b> | <b><u>0.81</u></b> |
|        |                                                             |                     | HIRASFQSKQGA               | 68-79               | 0.556               | VQVDDSGLASGINL               | 51-64               | 0.78               |
|        |                                                             |                     | <b><u>GSGILPKG</u></b>     | <b><u>9-20</u></b>  | <b><u>0.553</u></b> | GINLGTAFHIRASFQ              | 61-74               | 0.77               |
| LigB3  | <b><u>VTSNNPNIPLGKQ</u></b>                                 | <b><u>5-18</u></b>  | SSNPDLVQVDDS               | 45-56               | 0.739               | ILETADTGIVTISA               | 55-68               | 0.83               |
|        | <b><u>YSDNSNRDIS</u></b>                                    | <b><u>26-35</u></b> | <b><u>SDGSHQDISNDP</u></b> | <b><u>28-39</u></b> | <b><u>0.635</u></b> | IANIQNNGILETAD               | 47-60               | 0.80               |
|        |                                                             |                     | HIRASFQSKQGA               | 68-79               | 0.556               | <b><u>OIQVTSNNPNIPLG</u></b> | <b><u>2-15</u></b>  | <b><u>0.78</u></b> |

Supplementary Material

|       |                                 |                     |                            |                     |                     |                               |                     |                    |
|-------|---------------------------------|---------------------|----------------------------|---------------------|---------------------|-------------------------------|---------------------|--------------------|
|       |                                 |                     | <b><u>GSGILPKGTNRQ</u></b> | <b><u>9-20</u></b>  | <b><u>0.553</u></b> | <b><u>LIATGIYSDNSNRD</u></b>  | <b><u>20-33</u></b> | <b><u>0.77</u></b> |
|       |                                 |                     |                            |                     |                     | PLGKKQKLIATGIY                | 13-26               | 0.75               |
| LigB4 | <b><u>SPTNSTVAKGLQ</u></b>      | <b><u>6-17</u></b>  | <b><u>FTDNSNSDITDQ</u></b> | <b><u>26-37</u></b> | <b><u>0.972</u></b> | <b><u>TDNSNSDITDQVTW</u></b>  | <b><u>27-39</u></b> | <b><u>0.87</u></b> |
|       | <b><u>FTDNSNSDITD</u></b>       | <b><u>26-36</u></b> | TWDSSNTDILSI               | 39-50               | 0.851               | NQGNVKTASIGGI                 | 64-77               | 0.81               |
|       | T                               | 45                  | <b><u>ISVSPTNSTVAK</u></b> | <b><u>3-14</u></b>  | <b><u>0.83</u></b>  | FKATGIFTDNSNSD                | 20-33               | 0.79               |
|       | LSISNASDSHG                     | 48-58               | ASTLNQGNVKVT               | 60-71               | 0.352               | <b><u>VSISVSPTNSTVAK</u></b>  | <b><u>1-14</u></b>  | <b><u>0.77</u></b> |
|       |                                 |                     | GGIQGSTDFTVT               | 75-86               | 0.316               |                               |                     |                    |
| LigB5 | SPVLPSIAKGLT                    | 6-17                | <b><u>FTDNSKKDITDQ</u></b> | <b><u>26-37</u></b> | <b><u>0.954</u></b> | SVSNLDDNKGLGKA                | 48-61               | 0.84               |
|       | <b><u>FTDNSKKDIT</u></b>        | <b><u>26-35</u></b> | GDTTITATLGKV               | 65-76               | 0.944               | KGLTQKFTAIGIFT                | 14-27               | 0.83               |
|       | <b><u>SSAIVSVSNLDDNKGLG</u></b> | <b><u>43-59</u></b> | <b><u>LDDNKGLGKAHA</u></b> | <b><u>52-63</u></b> | <b><u>0.764</u></b> | <b><u>TDNSKKDITDQVTW</u></b>  | <b><u>27-40</u></b> | <b><u>0.77</u></b> |
|       |                                 |                     |                            |                     |                     | <b><u>NKGLGKAHAVGDTT</u></b>  | <b><u>55-68</u></b> | <b><u>0.76</u></b> |
| LigB6 | NPVNPSLAKGLT                    | 6-17                | <b><u>AQKNQGNAYGAA</u></b> | <b><u>53-64</u></b> | <b><u>0.973</u></b> | <b><u>ISNAQKNQGNAYGA</u></b>  | <b><u>50-63</u></b> | <b><u>0.87</u></b> |
|       | <b><u>YSDNSNKDIT</u></b>        | <b><u>26-35</u></b> | TFGKVSSPVSTL               | 83-94               | 0.847               | <b><u>GIYSDNSNKDITSA</u></b>  | <b><u>24-37</u></b> | <b><u>0.82</u></b> |
|       | SSDS                            | 42-45               | <b><u>FSATGIYSDNSN</u></b> | <b><u>20-31</u></b> | <b><u>0.503</u></b> | QKFSATGIYSDNSN                | 18-31               | 0.78               |
|       | <b><u>NAQKNQG</u></b>           | <b><u>52-58</u></b> | VTWFSSDSSIAT               | 38-49               | 0.469               | KDITSAVTWFSSDS                | 32-45               | 0.77               |
|       |                                 |                     | TSIQINPVNPSL               | 1-12                | 0.357               | QGNAYGAATGATDI                | 57-70               | 0.75               |
| LigB7 | TPAAASKAKGLT                    | 6-17                | ITNTSGSKGITN               | 50-61               | 0.999               | ITPAAASKAKGLTE                | 5-18                | 0.89               |
|       | <b><u>FTDNSNSDIT</u></b>        | <b><u>26-35</u></b> | <b><u>FTDNSNSDITNO</u></b> | <b><u>26-37</u></b> | <b><u>0.992</u></b> | <b><u>TDNSNSDITNOVTW</u></b>  | <b><u>27-40</u></b> | <b><u>0.83</u></b> |
|       | NTSGSKGI                        | 52-59               |                            |                     |                     | ASKAKGLTERFKAT                | 10-23               | 0.82               |
|       |                                 |                     |                            |                     |                     | SNTDIAEITNTSGS                | 43-56               | 0.79               |
|       |                                 |                     |                            |                     | NQVTWNSSTNDIAE      | 36-49                         | 0.76                |                    |
| LigB8 | <b><u>TPINPSVAKGLI</u></b>      | <b><u>6-17</u></b>  | VNNVTGSVTTVA               | 50-61               | 0.989               | VQDVTALATWSSSN                | 31-44               | 0.89               |
|       | <b><u>YTDHSVQDVT</u></b>        | <b><u>26-35</u></b> | <b><u>IAVTPINPSVAK</u></b> | <b><u>3-14</u></b>  | <b><u>0.979</u></b> | <b><u>FKATGTYT DHSVQD</u></b> | <b><u>20-33</u></b> | <b><u>0.84</u></b> |
|       | SSSNPRKAMV                      | 41-50               | <b><u>ATGTYTDHSVQD</u></b> | <b><u>22-33</u></b> | <b><u>0.911</u></b> | KGLIRQFKATGTYT                | 14-27               | 0.83               |
|       |                                 |                     |                            |                     |                     | GNTNIKATIDSISG                | 63-76               | 0.82               |
|       |                                 |                     |                            |                     |                     | SVTTVATGNTNIKA                | 56-69               | 0.80               |
|       |                                 |                     |                            |                     |                     | NPRKAMVNNVTGSV                | 44-57               | 0.78               |
|       |                                 |                     |                            |                     |                     | <b><u>PINPSVAKGLIROF</u></b>  | <b><u>7-20</u></b>  | <b><u>0.77</u></b> |
| LigB9 | <b><u>PTINSITHGLT</u></b>       | <b><u>7-17</u></b>  | <b><u>FSDKSTONLTQL</u></b> | <b><u>26-37</u></b> | <b><u>0.986</u></b> | TQNLTLVLTWISSD                | 31-44               | 0.88               |
|       | <b><u>FSDKSTONLT</u></b>        | <b><u>26-35</u></b> | IENTSGKKGIAT               | 50-61               | 0.899               | SDPSKIEIENTSGK                | 43-56               | 0.85               |

Supplementary Material

|        |                             |                     |                             |                     |                     |                               |                     |                    |
|--------|-----------------------------|---------------------|-----------------------------|---------------------|---------------------|-------------------------------|---------------------|--------------------|
|        | ISSDPSKIEIENTSGKK<br>GIA    | 41-60               | IQSSPIPITVTD                | 77-89               | 0.595               | <b><u>PTINSITHGLTKQF</u></b>  | <b><u>7-20</u></b>  | <b><u>0.82</u></b> |
|        | L                           | 65                  | <b><u>EITPTINSITHG</u></b>  | <b><u>4-15</u></b>  | <b><u>0.497</u></b> | <b><u>KATGIFSDKSTONL</u></b>  | <b><u>21-34</u></b> | <b><u>0.79</u></b> |
|        | FI                          | 76-77               |                             |                     |                     | THGLTKQFKATGIF                | 13-26               | 0.77               |
|        |                             |                     |                             |                     |                     | NTSGKKGIATASKL                | 52-65               | 0.76               |
| LigB10 | PSSSSIAKGLTQ                | 7-18                | VAPINNAANEKG                | 47-58               | 1                   | QQFKAIGTFIDGSE                | 18-31               | 0.90               |
|        | <b><u>FIDGSEOEI</u></b>     | <b><u>26-34</u></b> | <b><u>GSEQEITNLVTW</u></b>  | <b><u>29-40</u></b> | <b><u>0.741</u></b> | <b><u>ITNLVTWYSSKSDV</u></b>  | <b><u>34-47</u></b> | <b><u>0.75</u></b> |
|        | YSSKS                       | 41-45               |                             |                     |                     |                               |                     |                    |
|        | AANEKGLA                    | 53-60               |                             |                     |                     |                               |                     |                    |
| LigB11 | INPVNNNIAKGLT               | 5-17                | <b><u>ISNSTETK GKAT</u></b> | <b><u>50-61</u></b> | <b><u>0.97</u></b>  | QQYTALGVYSDSTI                | 18-31               | 0.90               |
|        | <b><u>YSDSTIQDIS</u></b>    | <b><u>26-35</u></b> | <b><u>YSDSTIQDISDS</u></b>  | <b><u>26-37</u></b> | <b><u>0.865</u></b> | ALQIGNSKITATYN                | 62-75               | 0.85               |
|        | SNS                         | 43-45               | IKINPVNNNIAK                | 3-14                | 0.853               | SSNSSSISISNSTE                | 42-55               | 0.84               |
|        | <b><u>STETK GK</u></b>      | <b><u>53-59</u></b> |                             |                     |                     | <b><u>SDSTIQDISDSVTW</u></b>  | <b><u>27-40</u></b> | <b><u>0.82</u></b> |
|        |                             |                     |                             |                     |                     | <b><u>NSTETK GKATALQI</u></b> | <b><u>52-65</u></b> | <b><u>0.79</u></b> |
|        |                             |                     |                             |                     |                     | AKGLTQQYTALGVY                | 13-26               | 0.77               |
| LigB12 | <b><u>ISPINTNINTTVS</u></b> | <b><u>5-17</u></b>  | <b><u>SPINTNINTTVS</u></b>  | <b><u>6-17</u></b>  | <b><u>0.936</u></b> | KADLTSSVTWSSSN                | 31-44               | 0.91               |
|        | <b><u>SAGTKADL</u></b>      | <b><u>27-34</u></b> | VTGIASGNPTII                | 60-71               | 0.916               | VTGIASGNPTIIAT                | 60-73               | 0.90               |
|        | SNQ                         | 43-45               | QAKVSNASETKG                | 47-58               | 0.339               | <b><u>FFAVGTYSAGTKAD</u></b>  | <b><u>20-34</u></b> | <b><u>0.85</u></b> |
|        | ETK                         | 55-57               | <b><u>GTYSAGTKADLT</u></b>  | <b><u>24-35</u></b> | <b><u>0.327</u></b> | KVSNASETKGLVTG                | 49-62               | 0.84               |
|        |                             |                     |                             |                     |                     | <b><u>PINTNINTTVSKQF</u></b>  | <b><u>7-20</u></b>  | <b><u>0.76</u></b> |

Supplementary Material  
**Table S4: List of predicted CTL epitopes**

| <b>Domain</b> | <b>IEDB</b> | <b>NetMHC 4.0</b> | <b>ProPred</b> |
|---------------|-------------|-------------------|----------------|
| LigA7         | FTDNSNSDI   | FTDNSNSDI         | FTDNSNSDI      |
|               | GTVKVTASM   | GTVKVTASM         | GTVKVTASM      |
|               | LTVSNTNAK   | SMGGIEDSV         | SMGGIEDSV      |
|               | STLKQGTVK   | VEIQITPAA         | VEIQITPAA      |
|               | LTVSNTNAK   | LTVSNTNAK         | LTVSNTNAK      |
|               |             |                   | STLKQGTVK      |
| LigA8         |             | ATLEKLSGK         | ATLEKLSGK      |
|               |             | TWKSSSKAL         | TWKSSSKAL      |
|               |             | EVSPTRASI         | EVSPTRASI      |
|               |             | KSSSKALSM         | KSSSKALSM      |
|               |             | KNITEQVTW         | KNITEQVTW      |
|               | QVTWKSSSK   |                   | QVTWKSSSK      |
|               | SIKGMTQK    |                   | SIKGMTQK       |
|               | GIFTDHKK    |                   | GIFTDHKK       |
| LigA9         | ATISNTKGY   | ATISNTKGY         | ATISNTKGY      |
|               | SVATISNTK   | SVATISNTK         | SVATISNTK      |
|               |             | TLGNVSSQV         | TLGNVSSQV      |
|               |             | KDITSAVTW         | KDITSAVTW      |
|               |             | WHSSNNSVA         | WHSSNNSVA      |
|               |             | SSKDITSAV         | SSKDITSAV      |
|               |             | GTVDIKATL         | GTVDIKATL      |
|               |             | YSDNSSKDI         | YSDNSSKDI      |
| LigA10        | SSANATFQV   | SSANATFQV         | SSANATFQV      |
|               | GVFTDNSTK   | GVFTDNSTK         | GVFTDNSTK      |
|               | KISNATGSK   | KISNATGSK         | KISNATGSK      |

Supplementary Material

|        |           |           |           |
|--------|-----------|-----------|-----------|
|        | ATFQVTPAK | ATFQVTPAK | ATFQVTPAK |
|        |           | ALSKGTSHI | ALSKGTSHI |
|        |           | GTSHISATL | GTSHISATL |
|        |           | SISSANATF | SISSANATF |
|        |           | TWKSSNTAY | TWKSSNTAY |
|        | KSSNTAYAK |           | KSSNTAYAK |
| LigA11 | FAKGNSYQF | FAKGNSYQF | FAKGNSYQF |
|        | SVLNVTPAL | SVLNVTPAL | SVLNVTPAL |
|        | KIASVENTF | KIASVENTF | KIASVENTF |
|        | ISFAKGNSY | ISFAKGNSY | ISFAKGNSY |
|        | VTWSSSNPK | VTWSSSNPK | VTWSSSNPK |
|        | YQFKATGIY | YQFKATGIY | YQFKATGIY |
|        | EVIPNNISF | EVIPNNISF | EVIPNNISF |
|        |           | YTDHSEADI | YTDHSEADI |
|        |           | ITAKLSDTV | ITAKLSDTV |
|        |           | DTVSGSSVL | DTVSGSSVL |
|        | NTFGSAGLV | NTFGSAGLV |           |
| LigA12 | YSDQSTKDL | YSDQSTKDL | YSDQSTKDL |
|        | TPGKKGLAF | TPGKKGLAF | TPGKKGLAF |
|        | FSSNPSSVV | FSSNPSSVV | FSSNPSSVV |
|        | HTQSSYTPV | HTQSSYTPV | HTQSSYTPV |
|        | KQFSAIGTY | KQFSAIGTY | KQFSAIGTY |
|        | YDHHTQSSY | YDHHTQSSY | YDHHTQSSY |
|        | RYIMITPSY | RYIMITPSY | RYIMITPSY |
|        |           | YIMITPSYA | YIMITPSYA |
|        |           | ELGEPDITV | ELGEPDITV |
|        |           | MITPSYAGI | MITPSYAGI |
|        | VVIENTPGK |           | VVIENTPGK |
|        | GTYSQSTK  |           | GTYSQSTK  |
| LigA13 | KTKGSTHQF | KTKGSTHQF | KTKGSTHQF |
|        | AEIDLTELV | AEIDLTELV | AEIDLTELV |

Supplementary Material

|       |           |           |           |
|-------|-----------|-----------|-----------|
|       |           | HQFKATGKF | HQFKATGKF |
|       |           | WSSSNPTVV | WSSSNPTVV |
|       | FENGAEIDL |           | FENGAEIDL |
|       | SSNPTVVS  |           | SSNPTVVS  |
|       | ISSSIDFEV |           | ISSSIDFEV |
|       | TISLSSISK |           | TISLSSISK |
| LigB1 | IANGTSTTL | IANGTSTTL | IANGTSTTL |
|       | TTLEVTAIF | TTLEVTAIF | TTLEVTAIF |
|       |           | IKAENGLY  | IKAENGLY  |
| LigB2 | HIRASFQSK | HIRASFQSK | HIRASFQSK |
|       | RQFSAIGIF | RQFSAIGIF | RQFSAIGIF |
|       | EEMTVGDAV | EEMTVGDAV | EEMTVGDAV |
|       |           | GTAHIRASF | GTAHIRASF |
|       |           | LPKGTNRQF | LPKGTNRQF |
|       |           | HQDISNDPL | HQDISNDPL |
|       |           | ISNDPLIVW | ISNDPLIVW |
|       | FSDGSHQDI |           | FSDGSHQDI |
| LigB3 |           | KQKLIATGI | KQKLIATGI |
|       |           | IPLGKKQKL | IPLGKKQKL |
|       |           | YSDNSNRDI | YSDNSNRDI |
|       |           | TADTGIVTI | TADTGIVTI |
| LigB4 |           | FTDNSNSDI | FTDNSNSDI |
|       |           | IQGSTDFTV | IQGSTDFTV |
| LigB5 | TSIEVSPVL |           | TSIEVSPVL |
|       | TTITATLGK |           | TTITATLGK |
| LigB6 | AQKNQGNAY | AQKNQGNAY | AQKNQGNAY |
|       | STLSVTAAK | STLSVTAAK | STLSVTAAK |
|       |           | QKFSATGIY | QKFSATGIY |
|       |           | KVSSPVSTL | KVSSPVSTL |
|       |           | KDITSAVTW | KDITSAVTW |
|       |           | GATDIKATF | GATDIKATF |

Supplementary Material

|           |           |           |           |
|-----------|-----------|-----------|-----------|
| LigB7     | FTDNSNSDI | FTDNSNSDI | FTDNSNSDI |
|           |           | EISAALGSI | EISAALGSI |
|           |           | ERFKATGIF | ERFKATGIF |
|           |           | VEIQITPAA | VEIQITPAA |
| LigB8     | RQFKATGTY | RQFKATGTY | RQFKATGTY |
|           | MVNNVTGSV | MVNNVTGSV | MVNNVTGSV |
|           | SVLNVTPAL | SVLNVTPAL | SVLNVTPAL |
|           | ATWSSSNPR | ATWSSSNPR | ATWSSSNPR |
|           | YTDHSVQDV | YTDHSVQDV | YTDHSVQDV |
|           | HSVQDVTAL | HSVQDVTAL | HSVQDVTAL |
| LigB9     | FSDKSTQNL | FSDKSTQNL | FSDKSTQNL |
|           | TSIEITPTI | TSIEITPTI | TSIEITPTI |
|           | QSSPIPIV  | QSSPIPIV  | QSSPIPIV  |
|           | FIQSSPIPI | FIQSSPIPI | FIQSSPIPI |
|           | YKFIQSSPI | YKFIQSSPI | YKFIQSSPI |
|           |           | TINSITHGL | TINSITHGL |
|           |           | KQFKATGIF | KQFKATGIF |
|           |           | ITHGLTKQF | ITHGLTKQF |
|           |           | SNIKAVYKF | SNIKAVYKF |
|           |           | EITPTINSI | EITPTINSI |
|           |           | KSTQNLTLQ | KSTQNLTLQ |
|           |           | SSNIKAVYK | SSNIKAVYK |
|           | LigB10    | GSSDIYAIY | GSSDIYAIY |
| FIDGSEQEI |           | FIDGSEQEI | FIDGSEQEI |
| LSIGSSDIY |           | LSIGSSDIY | LSIGSSDIY |
| NEKGLATAL |           | NEKGLATAL | NEKGLATAL |
| YAIYNSISS |           | YAIYNSISS | YAIYNSISS |
| QEITNLVTW |           | QEITNLVTW | QEITNLVTW |
|           |           | EITNLVTWY | EITNLVTWY |
|           |           | DIYAIYNSI | DIYAIYNSI |
|           |           | SSNKINFNV | SSNKINFNV |



Supplementary Material

|        |           |            |            |
|--------|-----------|------------|------------|
|        |           | QQFKAIGTF  | QQFKAIGTF  |
| LigB11 | YSDSTIQDI | YSDSTIQDI  | YSDSTIQDI  |
|        | QQYTALGVY | QQYTALGVY  | QQYTALGVY  |
|        | WSSSNSSSI | WSSSNSSSI  | WSSSNSSSI  |
|        |           | TIQDISDSV  | TIQDISDSV  |
|        |           | ETK GKATAL | ETK GKATAL |
|        |           | KITATYNSI  | KITATYNSI  |
| LigB12 | KQFFAVGTY | KQFFAVGTY  | KQFFAVGTY  |
|        |           | TIATYGSV   | TIATYGSV   |
|        |           | TVSKQFFAV  | TVSKQFFAV  |
|        |           | ETKGLVTGI  | ETKGLVTGI  |
|        |           | YSAGTKADL  | YSAGTKADL  |

Supplementary Material  
**Table S5: List of predicted HTL epitopes**

| <b>Domain</b> | <b>ProPred-I</b> | <b>NetMHC 2.3</b> | <b>IEDB</b> |
|---------------|------------------|-------------------|-------------|
| LigA7         | VEIQITPAA        | VEIQITPAA         |             |
|               | ILTVSNTNA        | ILTVSNTNA         |             |
|               | VKVTASMGG        | VKVTASMGG         |             |
|               | LVEIQITPAA       | LVEIQITPAA        |             |
|               | ILTVSNTNA        | ILTVSNTNA         |             |
|               | IQITPAAAS        | IQITPAAAS         |             |
| LigA8         | VTWKSSSK         | VTWKSSSK          |             |
|               | ISITATLEK        | ISITATLEK         |             |
|               | IEVSPTRAS        | IEVSPTRAS         |             |
| LigA9         | ITSAVTWHS        | ITSAVTWHS         |             |
|               | ITSAVTWHSSNNS    | ITSAVTWHSSNNS     |             |
|               | VDIKATLGNVS      | VDIKATLGNVS       |             |
|               | IKATLGNVSSQVS    | IKATLGNVSSQVS     |             |
|               | SNNSVATISNTKG    | SNNSVATISNTKG     |             |
| LigA10        | IVLNPTSSH        | IVLNPTSSH         | IVLNPTSSH   |
|               | WKSSNTAYA        | WKSSNTAYA         |             |
|               | IEIVLNPTS        | IEIVLNPTS         |             |
|               | IVLNPTSSHKA      | IVLNPTSSHKA       |             |
|               | LGSISSANA        | LGSISSANA         |             |
| LigA11        | SVLNVTPALL       | SVLNVTPALL        |             |

Supplementary Material

|        |              |              |           |
|--------|--------------|--------------|-----------|
|        | VIPNNISFA    | VIPNNISFA    |           |
|        | IEVIPNNIS    | IEVIPNNIS    |           |
|        | YQFKATGIY    | YQFKATGIY    |           |
|        | LVSTTNIGS    | LVSTTNIGS    |           |
| LigA12 | YIMITPSYA    | YIMITPSYA    | YIMITPSYA |
|        | IMITPSYAG    | IMITPSYAG    | IMITPSYAG |
|        | WFSSNPSSV    | WFSSNPSSV    |           |
|        | QSSYTPVTVTES | QSSYTPVTVTES |           |
|        | TVVFDHHTQS   | TVVFDHHTQS   |           |
|        | VTWFSSNPSSV  | VTWFSSNPSSV  |           |
| LigA13 | TVVSISNVDD   | TVVSISNVDD   |           |
|        | LVTWSSSNPT   | LVTWSSSNPT   |           |
|        | IVNITISLS    | IVNITISLS    |           |
|        | VNITISLSS    | VNITISLSS    |           |
|        | ITISLSSIS    | ITISLSSIS    |           |
| LigB1  | VVTIQGNRV    | VVTIQGNRV    |           |
|        | VTIQGNRVR    | VTIQGNRVR    |           |
|        | IQGNRVRGI    | IQGNRVRGI    |           |
| LigB3  | VKLIVTPAA    | VKLIVTPAA    | VKLIVTPAA |
|        | IVTISASSE    | IVTISASSE    |           |
|        | IWNSSNSTIA   | IWNSSNSTIA   |           |
|        | IQVTSNNPNI   | IQVTSNNPNI   |           |
|        | VKLIVTPAAL   | VKLIVTPAAL   |           |
|        | GIVTISASSE   | GIVTISASSE   |           |

Supplementary Material

|        |                 |                 |                 |
|--------|-----------------|-----------------|-----------------|
|        | IVTISASSEN      | IVTISASSEN      |                 |
| LigB5  | WLTVVPAVL       | WLTVVPAVL       |                 |
|        | WNSSSAIVS       | WNSSSAIVS       |                 |
|        | VLPSIAKGL       | VLPSIAKGL       |                 |
| LigB6  | IQINPVNPS       | IQINPVNPS       | IQINPVNPS       |
|        | ITSAVTWFS       | ITSAVTWFS       |                 |
|        | WFSSDSSIA       | WFSSDSSIA       |                 |
|        | VNPSLAKGL       |                 | VNPSLAKGL       |
| LigB7  | ILKVTPAQL       | ILKVTPAQL       | ILKVTPAQL       |
|        | VEIQITPAA       | VEIQITPAA       |                 |
|        | VILKVTPAQ       | VILKVTPAQ       |                 |
|        | IKSSKVILK       | IKSSKVILK       |                 |
|        | IQITPAAAS       | IQITPAAAS       |                 |
| LigB8  | VLNVTPALL       | VLNVTPALL       |                 |
|        | LIRQFKATGTY     | LIRQFKATGTY     |                 |
|        | MVNNVTGSV       | MVNNVTGSV       |                 |
|        | VTPINPSVATWSS   | VTPINPSVATWSS   |                 |
| LigB9  | AVYKFIQSSPIPIV  | AVYKFIQSSPIPIV  | AVYKFIQSSPIPIV  |
|        | FIQSSPIPI       | FIQSSPIPI       |                 |
|        | SIEITPTINS      | SIEITPTINS      |                 |
|        | WISSDPSKI       | WISSDPSKI       |                 |
| LigB10 | SDIYAIYNSISSNKI | SDIYAIYNSISSNKI | SDIYAIYNSISSNKI |
|        | SSDIYAIYNSISSNK | SSDIYAIYNSISSNK | SSDIYAIYNSISSNK |
|        | LVTWYSSKS       | LVTWYSSKS       |                 |

Supplementary Material

|        |              |              |  |
|--------|--------------|--------------|--|
|        | IYAIYNSIS    | IYAIYNSIS    |  |
|        | YAIYNSISS    | YAIYNSISS    |  |
|        | FKAIGTFID    | FKAIGTFID    |  |
|        | ITISPSSSS    | ITISPSSSS    |  |
| LigB11 | VTWSSSNSS    | VTWSSSNSS    |  |
|        | IKINPVNNN    | IKINPVNNN    |  |
| LigB12 | FFAVGTYSA    | FFAVGTYSA    |  |
|        | VTWSSSNQS    | VTWSSSNQS    |  |
|        | ISPINTNINTTV | ISPINTNINTTV |  |

**Figure legends**

**Figure S1:** Separate RMSD plot for the vaccine construct and TLR4 at 100ns.

**Figure S2:** RMSF plot for vaccine construct only at 50ns of MDS.

**Figure S3:** Separate Rg plot for TLR4 and vaccine construct at 100ns of MDS.

**Figure S1**

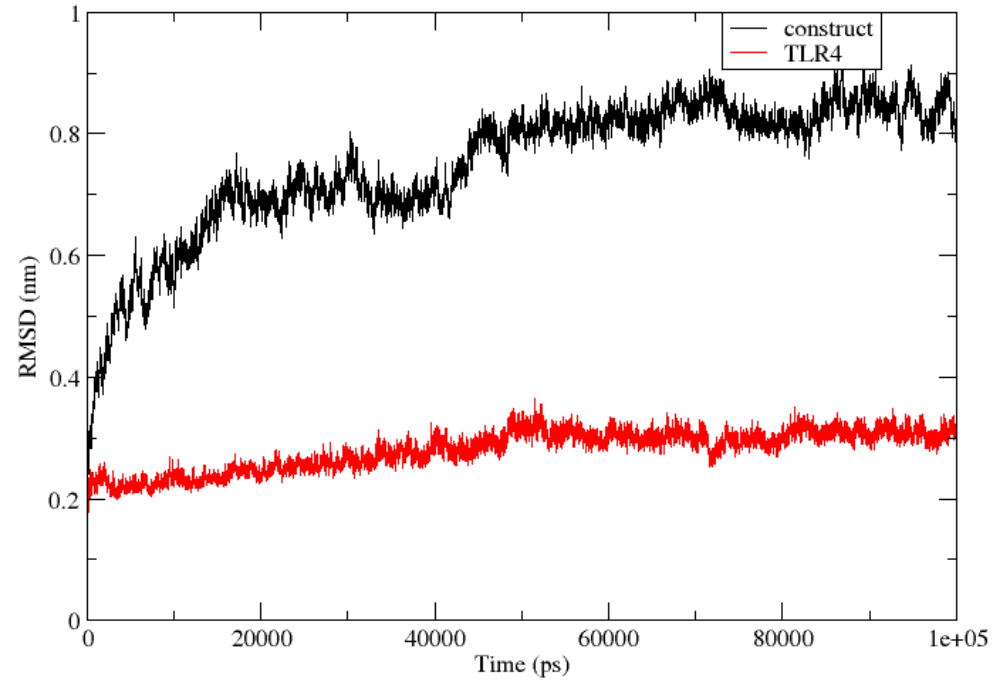

**Figure S2**

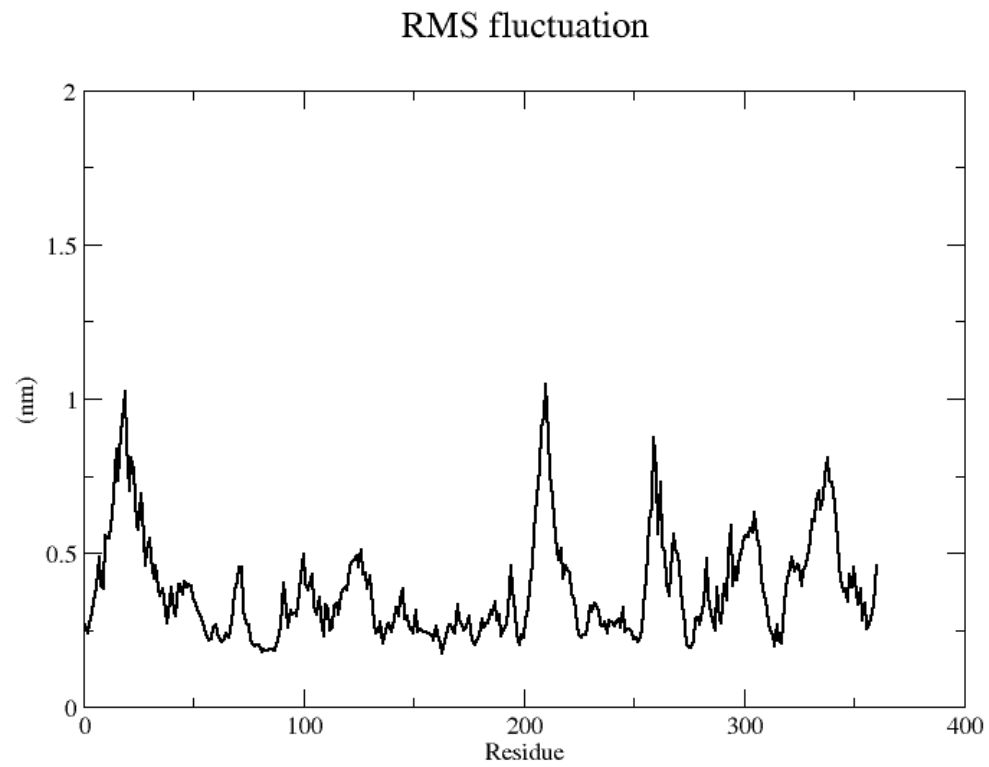



**Figure S3**

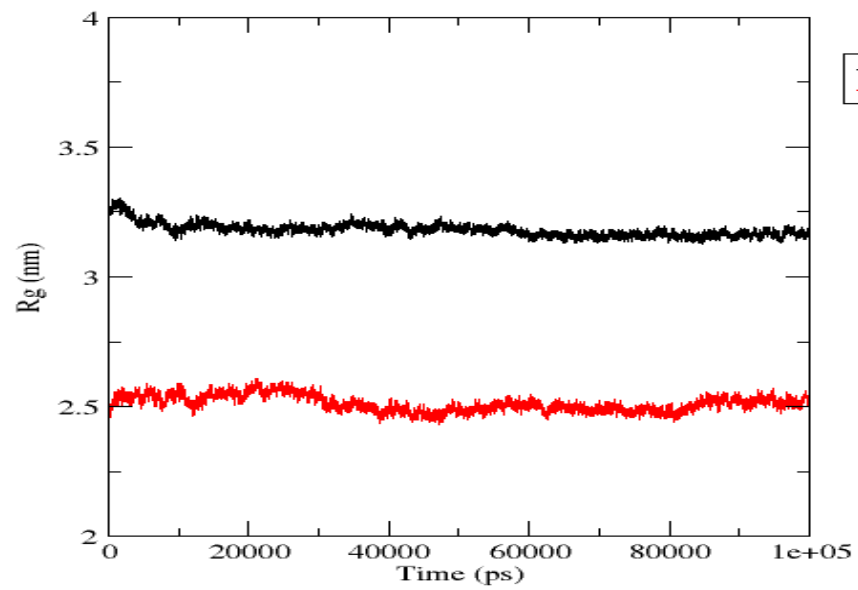

Supplement: DataSheet_1.pdf [file DataSheet_1.pdf]
